# Supplementary material for: Surface passivation strategies for CsPbBr3 quantum dots aiming at nonradiative suppression and enhancement of electroluminescent light-emitting diodes
Source: Royal Society of Chemistry journal article supplement (doi:10.1039/d4dt02705a), 2024-12-13
Supplement: d4dt02705a1.pdf [file d4dt02705a1.pdf]

## Supporting Information

# Surface Passivation Strategies for CsPbBr<sub>3</sub> Quantum Dots Aiming at Nonradiative Suppression and Electroluminescence Light-Emitting Diodes Enhancement

Weiwei Chen<sup>a</sup>, Lin Hu<sup>b\*</sup>, Yi Wang<sup>a</sup>, Lei Huang<sup>a</sup>, Zhen Wang<sup>a\*</sup>, Xiaosheng

Tang<sup>a\*</sup>

<sup>a</sup>College of Optoelectronic Engineering, Chongqing University of Post and  
Telecommunications, 400065, People's Republic of China

<sup>b</sup>Chongqing Hongyu Precision Industry Group Co., Ltd, 400799, People's Republic of  
China

E-mail: 17774904172@163.com, wangzhen@cqupt.edu.cn, xstang@cqupt.edu.cn,

Received xxxxxx

Accepted for publication xxxxxx

Published xxxxxx

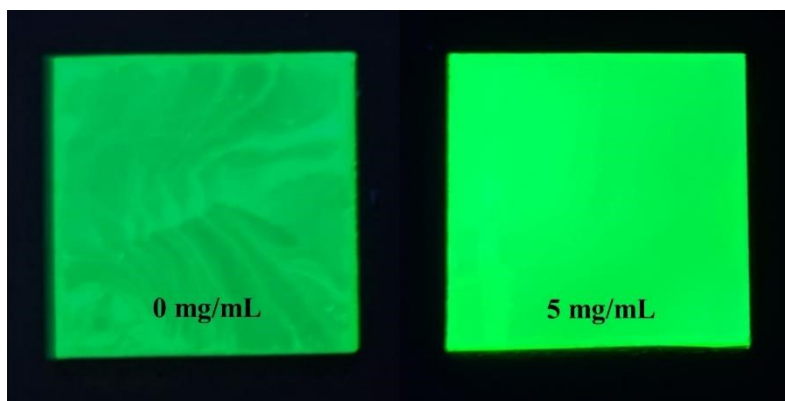

**Figure S1.** Display the digital images of the respective CsPbBr<sub>3</sub> QDs films with/without PEABr treatment under UV illumination.

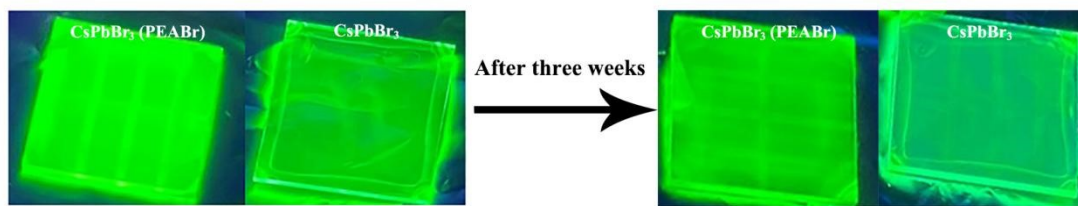

**Figure S2.** Change of brightness of CsPbBr<sub>3</sub> QDs films with/without PEABr treatment after stored three weeks under ambient environment.

**Table S1.** The best fit parameters of PL decay profiles for the CsPbBr<sub>3</sub> QD films measured at corresponding emission peak energies.

| Samples | $\tau_1$ (%) | $A_1$ (%) | $\tau_2$ (%) | $A_2$ (ns) | $\tau_{\text{avg}}$ (ns) |
|---------|--------------|-----------|--------------|------------|--------------------------|
| 0       | 5.2          | 55.4      | 25.3         | 44.6       | 21.21                    |
| 2       | 6.2          | 39.2      | 29.8         | 60.8       | 27                       |
| 3       | 6.9          | 33.3      | 31.4         | 66.7       | 28.98                    |
| 5       | 10.8         | 15.7      | 47.2         | 84.3       | 45.71                    |
| 7       | 7.7          | 25.6      | 33.9         | 74.4       | 32                       |

**Table S2.** The radiative rate constant ( $k_r$ ) and non-radiative rate constant ( $k_{nr}$ ) of CsPbBr<sub>3</sub> QDs with different PEABr concentrations.  $k_r = \text{PLQY}/\tau$ ,  $k_{nr} = (1-\text{PLQY})/\tau$

| Samples | PLQY (%) | Average Lifetime ( $\tau$ , ns) | $k_r$ (ns <sup>-1</sup> ) | $k_{nr}$ (ns <sup>-1</sup> ) |
|---------|----------|---------------------------------|---------------------------|------------------------------|
| 0       | 21.9     | 21.21                           | 0.01                      | 0.037                        |
| 2       | 31.2     | 27                              | 0.012                     | 0.025                        |
| 3       | 40.8     | 28.98                           | 0.014                     | 0.02                         |
| 5       | 78.6     | 45.71                           | 0.017                     | 0.005                        |
| 7       | 47.7     | 32                              | 0.015                     | 0.016                        |

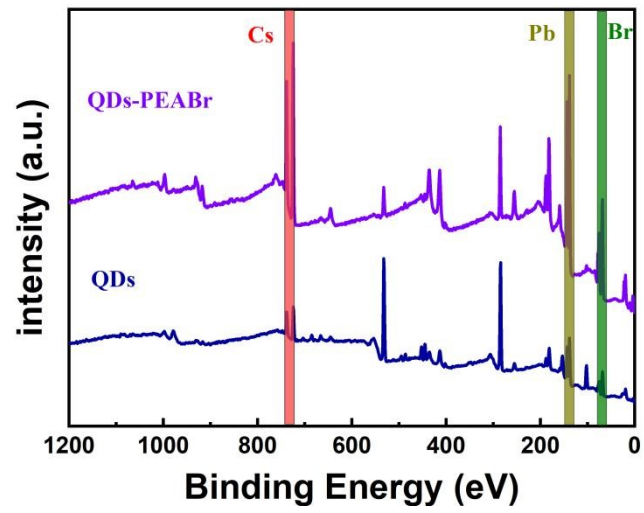

**Figure. S3** Survey XPS spectra of pristine and PEABr-treated CsPbBr<sub>3</sub> QDs.

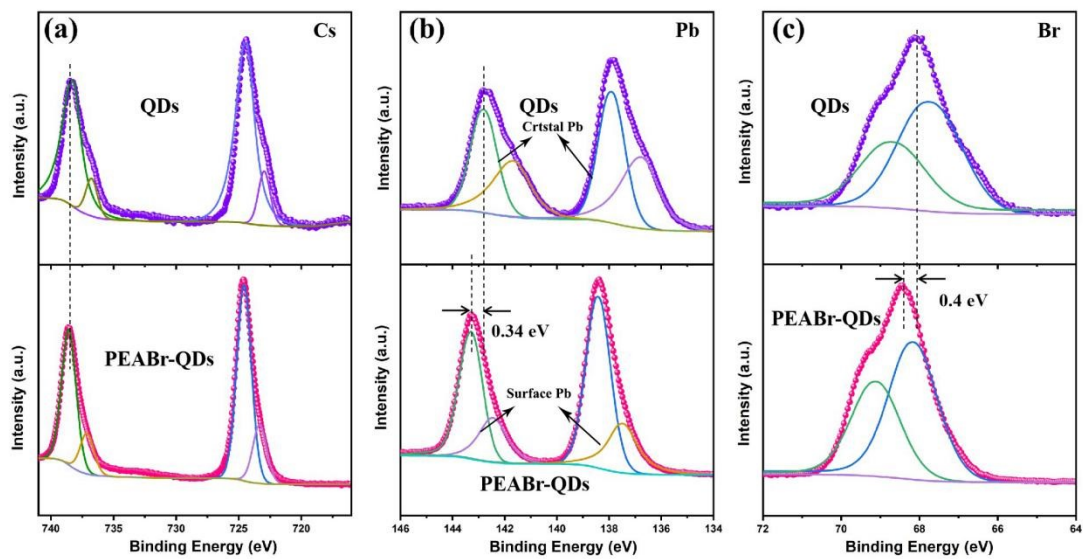

**Figure. S4** Deconvolution of (a) Cs 3d, (b) Pb 4f and (c) Br 3d spectra from PEABr untreated (top) and treated (down) QDs.

**Figure S5.** The photograph of CsPbBr<sub>3</sub> QDs solution under ambient light.

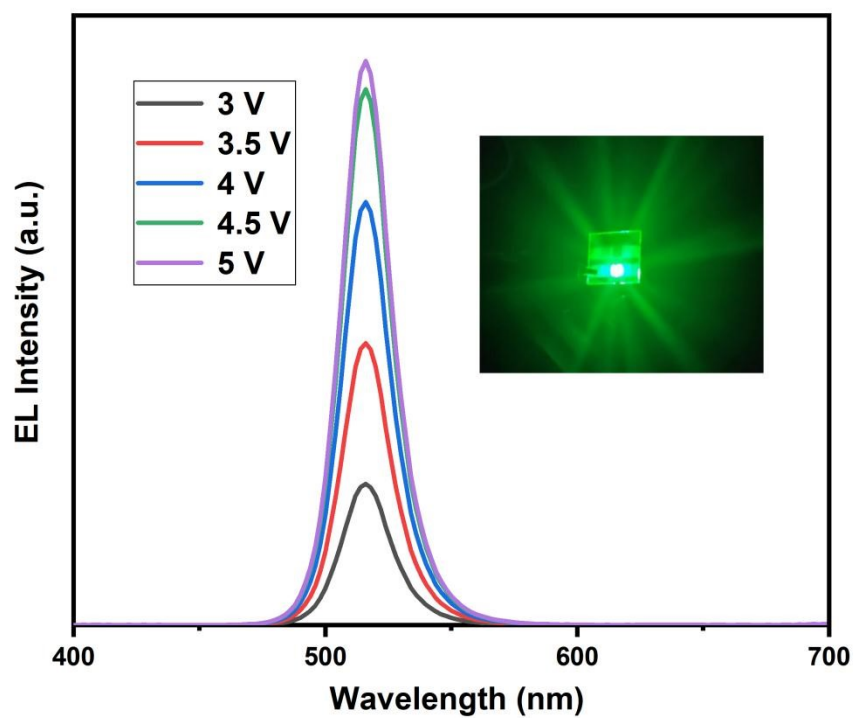

**Figure S6.** EL spectra of 5 wt% PEABr treated CsPbBr<sub>3</sub> QDs based QLED device under different driving voltage. Inset: emission image of the device with an emitting area of 3 mm×3 mm at 5.0 V.

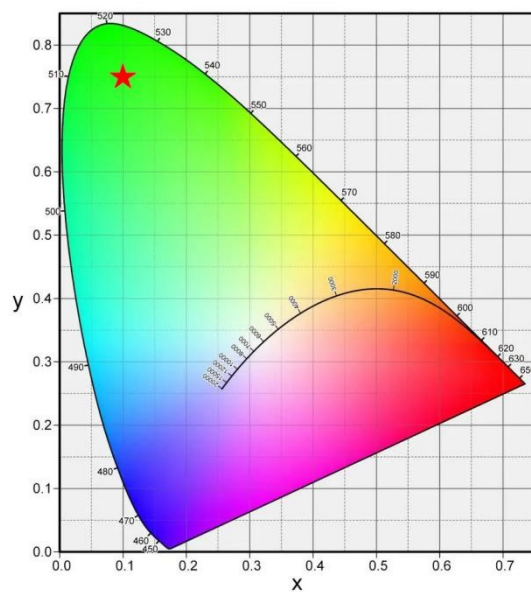

**Figure S7.** CIE coordinates of the PEABr treated device under an applied voltage of 5 V.



**Table S3** Summary of device performance of various CsPbBr<sub>3</sub> QLEDs prepared with PEABr passivation.

| Method        | Luminance<br>(cd m <sup>-2</sup> ) | CE (cd A <sup>-1</sup> ) | Max EQE<br>(%) | References |
|---------------|------------------------------------|--------------------------|----------------|------------|
| Hot-injection | 13770                              | 14.54                    | 4.59           | 1          |
| Hot-injection | 12807                              | 23.79                    | 6.85           | 2          |
| Hot-injection | 12650                              | 13.43                    | 4.33           | 3          |
| LARP          | 14035                              | 32.69                    | 9.67           | This work  |

## References

1. G. Li, J. Huang, H. Zhu, Y. Li, J. Tang, Y. Jiang, *Chem. Mater.* 2018, **30**, 6099.
2. S. He, N. Kumar, H. B. Lee, K. Ko, Y. Jung, J. I. Kim, S. Bae, J. Lee, J. Kang, *Chem. Eng. J.* 2021, **425**, 130678.
3. G. Li, J. Huang, Y. Li, J. Tang, Y. Jiang, *Nano Res.* 2019, **12**, 109.
